# Supplementary material for: Longitudinal Associations between Anatomical Regions of Pain and Work Conditions: A Study from The SwePain Cohort
Source: PubMed Central journal article supplement (PMC6617203; doi:10.3390/ijerph16122167), 2019-06-19
Supplement: ijerph-16-02167-s001.pdf [file ijerph-16-02167-s001.pdf]

**Table S1.** STROBE statement checklist—checklist of items that should be included in reports of observational studies.

|                          | <b>Item No</b> | <b>Recommendation</b>                                                                                                                                                                                | <b>Page # Line</b>        |
|--------------------------|----------------|------------------------------------------------------------------------------------------------------------------------------------------------------------------------------------------------------|---------------------------|
| Title and abstract       | 1              | (a) Indicate the study's design with a commonly used term in the title or the abstract                                                                                                               | Cover page #4–5           |
|                          |                | (b) Provide in the abstract an informative and balanced summary of what was done and what was found                                                                                                  | 1 # 3–22                  |
| <b>Introduction</b>      |                |                                                                                                                                                                                                      |                           |
| Background/rationale     | 2              | Explain the scientific background and rationale for the investigation being reported                                                                                                                 | 2–3 # 26–54               |
| Objectives               | 3              | State specific objectives, including any prespecified hypotheses                                                                                                                                     | 4 #55–64                  |
| <b>Methods</b>           |                |                                                                                                                                                                                                      |                           |
| Study design             | 4              | Present key elements of study design early in the paper                                                                                                                                              | 3 # 66–72                 |
| Setting                  | 5              | Describe the setting, locations, and relevant dates, including periods of recruitment, exposure, follow-up, and data collection                                                                      | 3/4 # 66–81               |
|                          |                | (a) Cohort study—Give the eligibility criteria, and the sources and methods of selection of participants. Describe methods of follow-up                                                              |                           |
| Participants             | 6              | Case-control study—Give the eligibility criteria, and the sources and methods of case ascertainment and control selection.                                                                           | 3/4 # 66–81               |
|                          |                | Give the rationale for the choice of cases and controls                                                                                                                                              |                           |
|                          |                | Cross-sectional study—Give the eligibility criteria, and the sources and methods of selection of participants                                                                                        |                           |
|                          |                | (b) Cohort study—For matched studies, give matching criteria and number of exposed and unexposed                                                                                                     | Not applicable            |
|                          |                | Case-control study—For matched studies, give matching criteria and the number of controls per case                                                                                                   |                           |
| Variables                | 7              | Clearly define all outcomes, exposures, predictors, potential confounders, and effect modifiers. Give diagnostic criteria, if applicable                                                             | 4/6 # 82–141              |
| Data sources/measurement | 8*             | For each variable of interest, give sources of data and details of methods of assessment (measurement). Describe comparability of assessment methods if there is more than one group                 | 4/6 # 82–141              |
| Bias                     | 9              | Describe any efforts to address potential sources of bias                                                                                                                                            | 6 # 124–141               |
| Study size               | 10             | Explain how the study size was arrived at                                                                                                                                                            | Figure 1                  |
| Quantitative variables   | 11             | Explain how quantitative variables were handled in the analyses. If applicable, describe which groupings were chosen and why                                                                         | 4/6 # 82–141              |
|                          |                | (a) Describe all statistical methods, including those used to control for confounding                                                                                                                | 6/8 # 142–178             |
| Statistical methods      | 12             | (b) Describe any methods used to examine subgroups and interactions                                                                                                                                  | 7 # 167–171               |
|                          |                | (c) Explain how missing data were addressed                                                                                                                                                          |                           |
|                          |                | (d) Cohort study—If applicable, explain how loss to follow-up was addressed                                                                                                                          |                           |
|                          |                | Case-control study—If applicable, explain how matching of cases and controls was addressed                                                                                                           | 7 # 164–165               |
|                          |                | Cross-sectional study—If applicable, describe analytical methods taking account of sampling strategy                                                                                                 |                           |
|                          |                | (e) Describe any sensitivity analyses                                                                                                                                                                | 7 # 167–171               |
| <b>Results</b>           |                |                                                                                                                                                                                                      |                           |
| Participants             | 13             | (a) Report numbers of individuals at each stage of study—e.g., numbers potentially eligible, examined for eligibility, confirmed eligible, included in the study, completing follow-up, and analysed | Figure 1                  |
|                          |                | (b) Give reasons for non-participation at each stage                                                                                                                                                 | 8 # 180–188               |
|                          |                | (c) Consider use of a flow diagram                                                                                                                                                                   | Figure 1                  |
| Descriptive data         | 14             | (a) Give characteristics of study participants (e.g., demographic, clinical, social) and information on exposures and potential confounders                                                          | 8 # 180–188<br>Tables 1,2 |
|                          |                | (b) Indicate number of participants with missing data for each variable of interest                                                                                                                  | Not applicable            |
|                          |                | (c) Cohort study—Summarise follow-up time (e.g., average and total amount)                                                                                                                           | Tables 1,2                |
| Outcome data             | 15             | Cohort study—Report numbers of outcome events or summary measures over time                                                                                                                          | Tables 1–4                |

|                   |    |                                                                                                                                                                                                                                                                                                                                                                                                                 |                              |
|-------------------|----|-----------------------------------------------------------------------------------------------------------------------------------------------------------------------------------------------------------------------------------------------------------------------------------------------------------------------------------------------------------------------------------------------------------------|------------------------------|
|                   |    | Case-control study—Report numbers in each exposure category, or summary measures of exposure                                                                                                                                                                                                                                                                                                                    |                              |
|                   |    | Cross-sectional study—Report numbers of outcome events or summary measures                                                                                                                                                                                                                                                                                                                                      |                              |
| Main results      | 16 | (a) Give unadjusted estimates and, if applicable, confounder-adjusted estimates and their precision (e.g., 95% confidence interval). Make clear which confounders were adjusted for and why they were included<br>(b) Report category boundaries when continuous variables were categorized<br>(c) If relevant, consider translating estimates of relative risk into absolute risk for a meaningful time period | 8/10 # 189–220<br>Tables 3,4 |
| Other analyses    | 17 | Report other analyses done—e.g., analyses of subgroups and interactions, and sensitivity analyses                                                                                                                                                                                                                                                                                                               | 9/10 # 221–231               |
| Discussion        |    |                                                                                                                                                                                                                                                                                                                                                                                                                 |                              |
| Key results       | 18 | Summarise key results with reference to study objectives                                                                                                                                                                                                                                                                                                                                                        | 10 # 234–246                 |
| Limitations       | 19 | Discuss limitations of the study, taking into account sources of potential bias or imprecision. Discuss both direction and magnitude of any potential bias                                                                                                                                                                                                                                                      | 13 # 298–318                 |
| Interpretation    | 20 | Give a cautious overall interpretation of results considering objectives, limitations, multiplicity of analyses, results from similar studies, and other relevant evidence                                                                                                                                                                                                                                      | 11/12 # 248–296              |
| Generalisability  | 21 | Discuss the generalisability (external validity) of the study results                                                                                                                                                                                                                                                                                                                                           | 13 # 300–303                 |
| Other information |    |                                                                                                                                                                                                                                                                                                                                                                                                                 |                              |
| Funding           | 22 | Give the source of funding and the role of the funders for the present study and, if applicable, for the original study on which the present article is based                                                                                                                                                                                                                                                   | 15 # 339–343                 |

**Table S2.** Model of changes over time between workload, psychosocial work stressors, and the number of anatomical pain regions by age.

| Outcome and Exposure Variables                                               | Crude Models           |         | Baseline Adjusted Models * |         | Fully Adjusted Models ** |         |
|------------------------------------------------------------------------------|------------------------|---------|----------------------------|---------|--------------------------|---------|
|                                                                              | B (95% CI)             | p-Value | B (95% CI)                 | p-Value | B (95% CI)               | p-Value |
| <b>Age &lt; 50 years</b>                                                     |                        |         |                            |         |                          |         |
| <b>Model of change 1, outcome: change in the number of ARP</b>               |                        |         |                            |         |                          |         |
| Predictor: change in mechanical exposure index                               | 0.12 (0.10 to 0.13)    | <0.001  | 0.12 (0.11 to 0.13)        | <0.001  | 0.08 (0.07 to 0.08)      | <0.001  |
| Predictor: change in physical exposure index                                 | 0.09 (0.07 to 0.10)    | <0.001  | -0.04 (-0.04 to -0.03)     | <0.001  | -0.00 (-0.00 to 0.00)    | 0.220   |
| Predictor: change in job demands                                             | 0.57 (0.55 to 0.59)    | <0.001  | 0.31 (0.29 to 0.34)        | <0.001  | 0.01 (-0.01 to 0.04)     | 0.168   |
| Predictor: change in job control                                             | -0.35 (-0.37 to -0.32) | <0.001  | -0.11 (-0.14 to -0.08)     | <0.001  | 0.18 (0.15 to 0.21)      | <0.001  |
| Predictor: change in job support                                             | -0.63 (-0.65 to -0.61) | <0.001  | -0.41 (-0.44 to -0.38)     | <0.001  | -0.09 (-0.11 to -0.06)   | <0.001  |
| <b>Age ≥ 50 years</b>                                                        |                        |         |                            |         |                          |         |
| <b>Model of change 1, outcome: change in the number of ARP</b>               |                        |         |                            |         |                          |         |
| Predictor: change in mechanical exposure index                               | 0.17 (0.16 to 0.17)    | <0.001  | 0.18 (0.17 to 0.18)        | <0.001  | 0.12 (0.11 to 0.13)      | <0.001  |
| Predictor: change in physical exposure index                                 | 0.13 (0.12 to 0.14)    | <0.001  | -0.08 (-0.09 to -0.08)     | <0.001  | -0.00 (-0.00 to 0.00)    | 0.278   |
| Predictor: change in job demands                                             | 0.71 (0.68 to 0.73)    | <0.001  | 0.28 (0.25 to 0.30)        | <0.001  | 0.03 (-2.17 to 0.06)     | 0.057   |
| Predictor: change in job control                                             | -0.82 (-0.85 to -0.79) | <0.001  | -0.50 (-0.54 to -0.47)     | <0.001  | -0.07 (-0.10 to -0.03)   | <0.001  |
| Predictor: change in job support                                             | -0.89 (-0.92 to -0.86) | <0.001  | -0.57 (-0.60 to -0.54)     | <0.001  | 0.01 (-0.02 to 0.05)     | 0.382   |
| <b>Age &lt; 50 years</b>                                                     |                        |         |                            |         |                          |         |
| <b>Model of change 2, outcomes: workload and psychosocial work stressors</b> |                        |         |                            |         |                          |         |
| <i>Model of change 2, outcome: change in mechanical exposure index</i>       |                        |         |                            |         |                          |         |
| Predictor: change in the number of ARP                                       | 0.28 (0.27 to 0.29)    | <0.001  | 0.14 (0.13 to 0.14)        | <0.001  | 0.10 (0.09 to 0.11)      | <0.001  |
| <i>Model of change 2, outcome: change in physical exposure index</i>         |                        |         |                            |         |                          |         |
| Predictor: change in the number of ARP                                       | 0.13 (0.12 to 0.14)    | <0.001  | -0.03 (-0.03 to -0.02)     | <0.001  | -0.00 (-0.00 to 0.00)    | 0.219   |
| <i>Model of change 2, outcome: change in job demands</i>                     |                        |         |                            |         |                          |         |
| Predictor: change in the number of ARP                                       | 0.03 (0.03 to 0.03)    | <0.001  | 0.02 (0.01 to 0.02)        | <0.001  | 0.00 (0.00 to 0.00)      | 0.169   |
| <i>Model of change 2, outcome: change in job control</i>                     |                        |         |                            |         |                          |         |
| Predictor: change in the number of ARP                                       | -0.01 (-0.02 to -0.01) | <0.001  | -0.01 (-0.01 to -0.00)     | <0.001  | 0.01 (0.01 to 0.01)      | <0.001  |
| <i>Model of change 2, outcome: change in job support</i>                     |                        |         |                            |         |                          |         |
| Predictor: change in the number of ARP                                       | -0.03 (-0.03 to -0.02) | <0.001  | -0.02 (-0.02 to -0.01)     | <0.001  | -0.01 (-0.01 to -0.01)   | <0.001  |
| <b>Age ≥ 50 years</b>                                                        |                        |         |                            |         |                          |         |
| <b>Model of change 2, outcomes: workload and psychosocial work stressors</b> |                        |         |                            |         |                          |         |
| <i>Model of change 2, outcome: change in mechanical exposure index</i>       |                        |         |                            |         |                          |         |
| Predictor: change in the number of ARP                                       | 0.31 (0.30 to 0.32)    | <0.001  | 0.16 (0.15 to 0.16)        | <0.001  | 0.13 (0.12 to 0.14)      | <0.001  |
| <i>Model of change 2, outcome: change in physical exposure index</i>         |                        |         |                            |         |                          |         |
| Predictor: change in the number of ARP                                       | 0.13 (0.12 to 0.13)    | <0.001  | -0.04 (-0.05 to -0.01)     | <0.001  | -0.00 (-0.01 to 0.01)    | 0.277   |
| <i>Model of change 2, outcome: change in job demands</i>                     |                        |         |                            |         |                          |         |
| Predictor: change in the number of ARP                                       | 0.03 (0.03 to 0.03)    | <0.001  | -0.02 (-0.02 to -0.01)     | <0.001  | -0.01 (-0.01 to 0.01)    | 0.810   |
| <i>Model of change 2, outcome: change in job control</i>                     |                        |         |                            |         |                          |         |
| Predictor: change in the number of ARP                                       | -0.02(-0.02 to -0.02)  | <0.001  | -0.01 (-0.01 to -0.01)     | <0.001  | -0.01 (-0.01 to -0.00)   | <0.001  |
| <i>Model of change 2, outcome: change in job support</i>                     |                        |         |                            |         |                          |         |
| Predictor: change in the number of ARP                                       | -0.03 (-0.03 to -0.02) | <0.001  | -0.01 (-0.02 to -0.01)     | <0.001  | 0.00 (-0.01 to 0.01)     | 0.382   |

ARP = anatomical regions with pain; B = regression coefficients; CI = confidence intervals. \* Model adjusted for changes in workload, psychosocial work stressors, and number of ARP; \*\* Model adjusted for time-independent gender and time-dependent changes in, education, smoking, alcohol intake, psychical activity, distress, and changes in workload, psychosocial work stressors, and the number of ARP.

**Table S3.** Model of changes over time between workload, psychosocial work stressors, and the number of anatomical pain regions by gender.

| Outcome and Exposure Variables                                               | Crude Models           |         | Baseline Adjusted Models * |         | Fully Adjusted Models ** |         |
|------------------------------------------------------------------------------|------------------------|---------|----------------------------|---------|--------------------------|---------|
|                                                                              | B (95% CI)             | p-Value | B (95% CI)                 | p-Value | B (95% CI)               | p-Value |
| <b>Men</b>                                                                   |                        |         |                            |         |                          |         |
| <b>Model of change 1, outcome: change in the number of ARP</b>               |                        |         |                            |         |                          |         |
| Predictor: change in mechanical exposure index                               | 0.11 (0.11 to 0.12)    | <0.001  | 0.11 (0.10 to 0.11)        | <0.001  | 0.08 (0.08 to 0.09)      | <0.001  |
| Predictor: change in physical exposure index                                 | 0.12 (0.11 to 0.12)    | <0.001  | -0.02 (-0.02 to -0.01)     | <0.001  | -0.00 (-0.01 to 0.02)    | 0.235   |
| Predictor: change in job demands                                             | 0.53 (0.51 to 0.55)    | <0.001  | 0.22 (0.20 to 0.24)        | <0.001  | 0.03 (0.01 to 0.05)      | 0.002   |
| Predictor: change in job control                                             | -0.26(-0.28 to -0.24)  | <0.001  | -0.01 (-0.03 to 0.11)      | 0.355   | 0.04 (0.02 to 0.07)      | 0.001   |
| Predictor: change in job support                                             | -0.59 (-0.61 to -0.57) | <0.001  | -0.38 (-0.40 to -0.36)     | <0.001  | -0.02 (-0.04 to 0.01)    | 0.183   |
| <b>Women</b>                                                                 |                        |         |                            |         |                          |         |
| <b>Model of change 1, outcome: change in the number of ARP</b>               |                        |         |                            |         |                          |         |
| Predictor: change in mechanical exposure index                               | 0.19 (0.18 to 0.19)    | <0.001  | 0.18 (0.18 to 0.19)        | <0.001  | 0.13 (0.12 to 0.14)      | <0.001  |
| Predictor: change in physical exposure index                                 | 0.14 (0.13 to 0.15)    | <0.001  | -0.05 (-0.06 to -0.04)     | 0.006   | 0.00 (-0.00 to 0.01)     | 0.603   |
| Predictor: change in job demands                                             | 0.63 (0.60 to 0.65)    | <0.001  | 0.18 (0.16 to 0.21)        | <0.001  | -0.04 (-0.07 to -0.01)   | 0.015   |
| Predictor: change in job control                                             | -0.54 (-0.56 to -0.50) | <0.001  | -0.15 (-0.18 to -0.11)     | <0.001  | 0.00 (-0.04 to 0.04)     | 0.985   |
| Predictor: change in job support                                             | -0.82 (-0.44 to -0.38) | <0.001  | -0.61 (-0.65 to -0.58)     | <0.001  | -0.06 (-0.09 to -0.02)   | 0.002   |
| <b>Men</b>                                                                   |                        |         |                            |         |                          |         |
| <b>Model of change 2, outcomes: workload and psychosocial work stressors</b> |                        |         |                            |         |                          |         |
| <i>Model of change 2, outcome: change in mechanical exposure index</i>       |                        |         |                            |         |                          |         |
| Predictor: change in the number of ARP                                       | 0.48 (0.47 to 0.49)    | <0.001  | 0.20 (0.19 to 0.21)        | <0.001  | 0.18 (0.17 to 0.19)      | <0.001  |
| <i>Model of change 2, outcome: change in physical exposure index</i>         |                        |         |                            |         |                          |         |
| Predictor: change in the number of ARP                                       | 0.25 (0.24 to 0.25)    | <0.001  | -0.02 (-0.02 to -0.01)     | <0.001  | -0.01 (-0.01 to 0.01)    | 0.235   |
| <i>Model of change 2, outcome: change in job demands</i>                     |                        |         |                            |         |                          |         |
| Predictor: change in the number of ARP                                       | 0.04 (0.03 to 0.04)    | <0.001  | 0.02 (0.01 to 0.02)        | <0.001  | 0.00 (0.00 to 0.00)      | 0.255   |
| <i>Model of change 2, outcome: change in job control</i>                     |                        |         |                            |         |                          |         |
| Predictor: change in the number of ARP                                       | -0.01 (-0.02 to -0.01) | <0.001  | -0.00 (-0.00 to 0.00)      | 0.355   | 0.00 (0.00 to 0.00)      | 0.001   |
| <i>Model of change 2, outcome: change in job support</i>                     |                        |         |                            |         |                          |         |
| Predictor: change in the number of ARP                                       | -0.04 (-0.04 to -0.03) | <0.001  | -0.02 (-0.02 to -0.01)     | <0.001  | -0.00 (-0.00 to 0.00)    | 0.184   |
| <b>Women</b>                                                                 |                        |         |                            |         |                          |         |
| <b>Model of change 2, outcomes: workload and psychosocial work stressors</b> |                        |         |                            |         |                          |         |
| <i>Model of change 2, outcome: change in mechanical exposure index</i>       |                        |         |                            |         |                          |         |
| Predictor: change in the number of ARP                                       | 0.23 (0.23 to 0.24)    | <0.001  | 0.21 (0.15 to 0.22)        | <0.001  | 0.19 (0.18 to 0.20)      | <0.001  |
| <i>Model of change 2, outcome: change in physical exposure index</i>         |                        |         |                            |         |                          |         |
| Predictor: change in the number of ARP                                       | 0.11 (0.10 to 0.11)    | <0.001  | -0.02 (-0.03 to -0.02)     | <0.001  | 0.00 (-0.00 to 0.01)     | 0.603   |
| <i>Model of change 2, outcome: change in job demands</i>                     |                        |         |                            |         |                          |         |
| Predictor: change in the number of ARP                                       | 0.02 (0.02 to 0.03)    | <0.001  | 0.01 (0.00 to 0.01)        | <0.001  | -0.01 (-0.01 to -0.00)   | 0.015   |
| <i>Model of change 2, outcome: change in job control</i>                     |                        |         |                            |         |                          |         |
| Predictor: change in the number of ARP                                       | -0.01 (-0.02 to -0.01) | <0.001  | -0.01 (-0.01 to -0.01)     | <0.001  | -0.00 (-0.00 to 0.00)    | 0.985   |
| <i>Model of change 2, outcome: change in job support</i>                     |                        |         |                            |         |                          |         |
| Predictor: change in the number of ARP                                       | -0.02 (-0.03 to -0.02) | <0.001  | -0.01 (-0.02 to -0.01)     | <0.001  | -0.01 (-0.01 to -0.00)   | 0.002   |

ARP = anatomical regions with pain; B = regression coefficients; CI = confidence intervals. \* Model adjusted for changes in workload, psychosocial work stressors, and number of ARP; \*\* Model adjusted for time-dependent changes in age, education, smoking, alcohol intake, physical activity, distress, and changes in workload, psychosocial work stressors, and the number of ARP.
